# Supplementary material
Source: publisher figshare collection journal article supplement (https://acs.figshare.com/ndownloader/files/3952732)
Supplement: Supplementary file 1 [file 3952732]

Supporting Information

Table S1 Composition of buffers with different pHs used in this work.

| Composition | pH |
| --- | --- |
| 20 mM PBS, 140 mM NaCl | 5.8 |
| 20 mM PBS, 140 mM NaCl | 6.6 |
| 20 mM PBS, 140 mM NaCl | 7.4 |
| 50 mM Tris, 50 mM HCl | 8.2 |
| 50 mM Tris, 50 mM HCl | 9.0 |
| 0.1 M NaHCO3, 0.1 M Na2CO3 | 9.8 |
| 0.1 M NaHCO3, 0.1 M Na2CO3 | 10.6 |

Figure S1 Normalized UV-vis absorption and fluorescence spectra of donor (PFEP) and acceptor (FAM).

Figure S2 Responses of FRET signal to different [PFEP]:[Apt15-A/Apt15-B] ratios.

Figure S3 Florescence emission intensity of PFEP in solutions of different pHs.

Figure S4 Response of I525 nm/I440 nm for protein detection using Apt15-A individual.
